# Supplementary material for: Selective Cu4Pd alloy nanoparticles anchoring on amine functionalized graphite nanosheets and their use as reusable catalysts for a C–C coupling reaction with the sacrificial role of Cu for Pd-regeneration
Source: Royal Society of Chemistry journal article supplement (doi:10.1039/c6dt01683a), 2016-01-01
Supplement: c6dt01683a1.pdf [file c6dt01683a1.pdf]

## Electronic Supplementary Information (ESI)

# Selective Cu<sub>4</sub>Pd alloy nanoparticles anchoring on amine functionalized graphite nanosheet and its use as reusable catalyst for C–C coupling reaction with sacrificial role of Cu for Pd–regeneration

Amrita Chakravarty<sup>a</sup> and Goutam De<sup>a\*</sup>

<sup>a</sup> Nano-Structured Materials Division, CSIR–Central Glass & Ceramic Research Institute, 196, Raja S. C. Mullick Road, Kolkata–700032, India

**Table S1** Composition of Cu–Pd alloy determined from different analytical techniques.

| Analysis technique | Composition                           |
|--------------------|---------------------------------------|
| ICP                | Cu <sub>0.82</sub> Pd <sub>0.18</sub> |
| XRD                | Cu <sub>0.82</sub> Pd <sub>0.18</sub> |
| XPS                | Cu <sub>0.81</sub> Pd <sub>0.19</sub> |
| EDS                | Cu <sub>0.80</sub> Pd <sub>0.20</sub> |

**Table S2** Percentage yields in five consecutive cycles of C–C coupling reaction with PhI and PBA using different catalysts.

| Catalyst name            | Isolated Yield % |              |             |              |             |
|--------------------------|------------------|--------------|-------------|--------------|-------------|
|                          | First cycle      | Second cycle | Third cycle | Fourth cycle | Fifth cycle |
| Cu <sub>4</sub> Pd@AFGNS | 79               | 80.5         | 72          | 70           | 70          |
| Pd@AFGNS                 | 83.5             | 49.5         | –           | –            | –           |

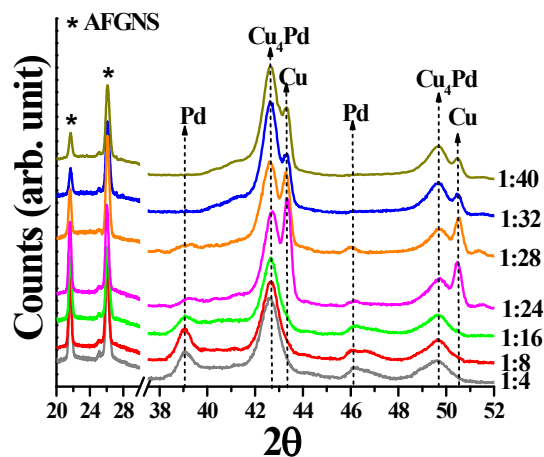

**Fig. S1** Solvothermal reaction carried out with different molar ratio of PdCl<sub>2</sub> : CuCl<sub>2</sub>·H<sub>2</sub>O for optimization of the reaction parameter

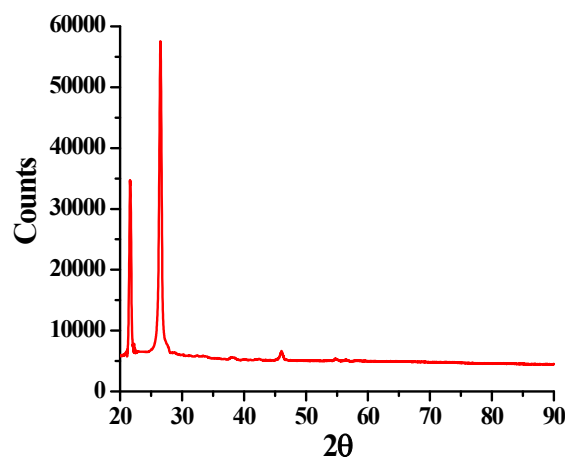

**Fig. S2** XRD pattern of AFGNS.

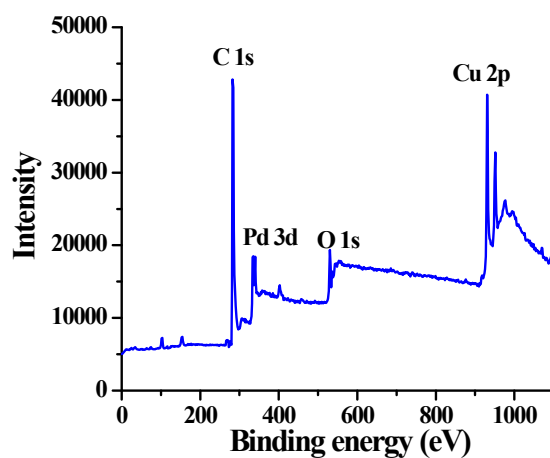

**Fig. S3** XPS survey scan of Cu<sub>4</sub>Pd@AFGNS.

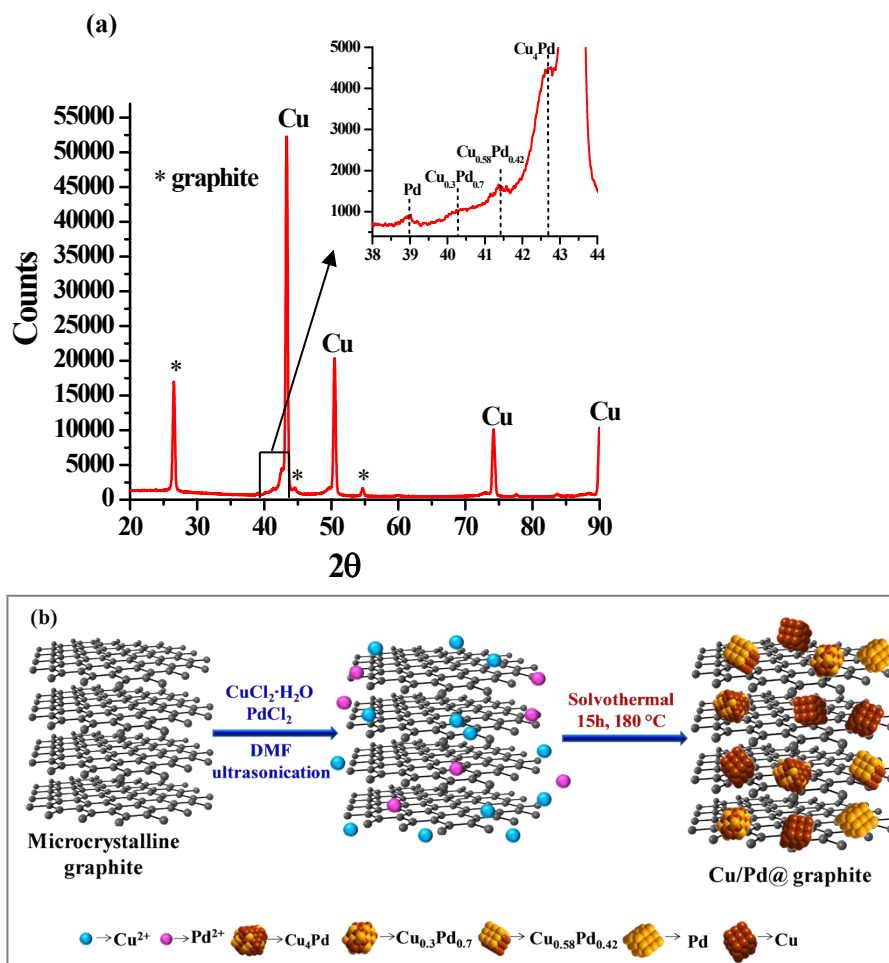

**Fig. S4** (a) XRD pattern of Cu/Pd@graphite with a portion of the spectrum magnified in the inset and (b) schematic representation of synthesis of Cu/Pd@graphite.

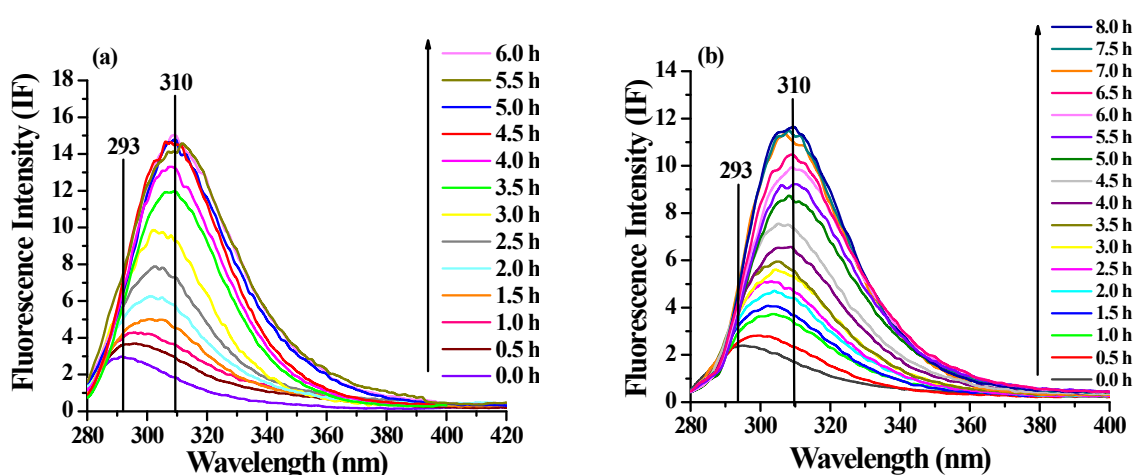

**Fig. S5** Successive fluorescence spectra of the C–C coupling reaction at 50 °C in the presence of the Cu<sub>4</sub>Pd@AFGNS catalyst between phenylboronic acid and (a) bromobenzene (PhBr), (b) chlorobenzene (PhCl).

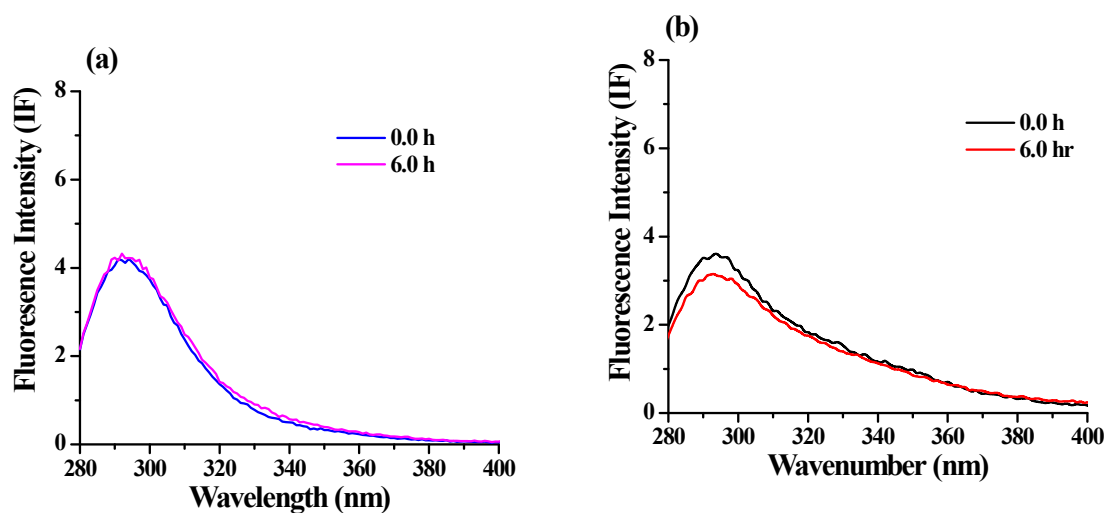

**Fig. S6** Fluorescence spectra of the C–C coupling reaction carried out (a) in absence of catalyst and (b) with AFGNS in absence of any alloy or metal NPs.

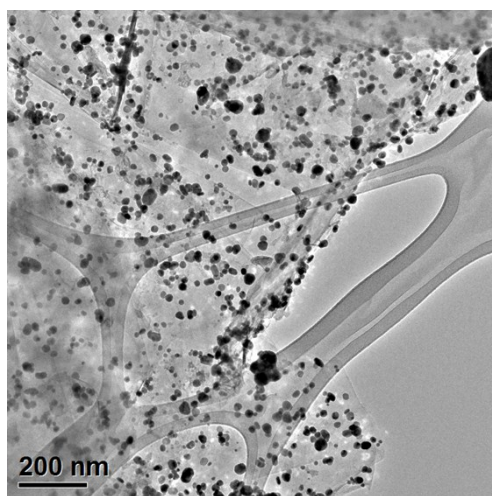

**Fig. S7** TEM image of  $\text{Cu}_4\text{Pd}@$ AFGNS catalyst after five cycles of C–C coupling reaction with PhI and PBA.
